# Supplementary material for: Translational control of small heat shock genes in mesophilic and thermophilic cyanobacteria by RNA thermometers
Source: PubMed Central journal article supplement — RNA Biol. 2014 Apr 2;11(5):594–608. doi: 10.4161/rna.28648 (PMC4152365; doi:10.4161/rna.28648), 2014-04-02
Supplement: rna-11-594-s01.pdf [file rna-11-594-s01.pdf]

## **Supplemental Material to:**

**Annika Cimdins, Birgit Klinkert, Ursula Aschke-Sonnenborn, Friederike M Kaiser, Jens Kortmann, and Franz Narberhaus**

**Translational control of small heat shock genes in mesophilic and thermophilic cyanobacteria by RNA thermometers**

**2014; 11(5)**

**<http://dx.doi.org/10.4161/rna.28648>**

**[www.landesbioscience.com/journals/rnabiology/article/28648/](http://www.landesbioscience.com/journals/rnabiology/article/28648/)**

# **Translational control of small heat shock genes in mesophilic and thermophilic cyanobacteria by RNA thermometers**

Annika Cimdins#, Birgit Klinkert#, Ursula Aschke-Sonnenborn#,  
Friederike M. Kaiser#, Jens Kortmann#+, and Franz Narberhaus#\*

# Lehrstuhl für Biologie der Mikroorganismen, Ruhr-Universität Bochum, 44780  
Bochum, Germany

+ present address: Department of Microbiology and Immunology, Stanford School of  
Medicine, Stanford University, 299 Campus Drive, Mail Code 5124, Stanford, CA  
94305, United States

## **Supplementary Information**

Fig. S1 Sequence alignment of *hspA*-5'UTR from *Thermosynechococci*.

Table S1 Strains, plasmids, and oligonucleotides used in this study

\* Corresponding author: Franz Narberhaus, Lehrstuhl für Biologie der  
Mikroorganismen, Ruhr-Universität Bochum, Universitätsstraße 150,  
NDEF 06/783, 44780 Bochum, Germany. Phone: +49 (0)234 322 3100;  
Fax: +49 (0)234 321 4620; Email: franz.narberhaus@rub.de

# Fig. S1

```

                                -35                                -10                                *
T. vulcanus hspA      GATCGTTAAACCCACTTGTATCAAGACTTGCATCCTCTATAGTGAAGGTGGGTAGAGGG
T. elongatus hspA   GATCGTTAAACCCACTTGTATCAAGACTTGCATCCTCTATAGTGAAGGTGGGTAGAGGG
                        *****
                                IR
T. vulcanus hspA      AATCAGCCCAAGTCACGAGCAAAGGCAATACAAGCAAATTTAGTTGTTGGTGCTGTTCTC
T. elongatus hspA   AATCAGCCCAAGTCACGAGCAAAGGCAATACAAGCAAATTTAGTTGTTGGTGCTGTTCTC
                        *****
                                SD
T. vulcanus hspA      TCTGTCAACCATCCCGCGGGCAATCTAAAACATA-----TACAGGAGGATAAGCGTATGGCA
T. elongatus hspA   TCTGTCAACCATCCCGCGGGCAATCTAAAACATAAACGATACAGGAGGATAAGCGTATGGCA
                        *****

```

## Fig. S1 Sequence alignment of *hspA* upstream region from *Thermosynechococci*.

The sequence alignment was performed using ClustalW2<sup>1, 2</sup>, asterisks mark similar positions. Promoter sequence, transcriptional start site (-), Shine-Dalgarno sequence (SD), and ATG are depicted in bold. The *hspA* nucleotide sequence from *T. vulcanus* was retrieved from<sup>3</sup>, as well as the highlighted inverted repeat, a putative DNA protein binding site. The transcriptional start site was mapped before.<sup>4</sup> The *hspA* upstream region from both *Thermosynechococci* is highly similar, the 5'UTR just being elongated by 6 nt. Therefore, the same transcriptional start site as for *T. vulcanus hspA* was assumed for *T. elongatus hspA*.

| Strain, plasmid, or oligonucleotide                           | Relevant characteristic or Sequence                                                                                                                                       | Source or Reference |
|---------------------------------------------------------------|---------------------------------------------------------------------------------------------------------------------------------------------------------------------------|---------------------|
| <b>Strains</b>                                                |                                                                                                                                                                           |                     |
| <i>Escherichia coli</i> DH5 $\alpha$                          | <i>supE44</i> , $\Delta$ <i>lacU169</i> ( $\Phi$ 80d <i>lacZ</i> $\Delta$ M15), <i>hsdR17</i> , <i>recA1</i> , <i>endA1</i> , <i>gyrA96</i> , <i>thi-1</i> , <i>relA1</i> | 5, 6<br>7<br>8<br>9 |
| <i>Thermosynechococcus elongatus</i> BP-1                     | Wild type                                                                                                                                                                 |                     |
| <i>Anabaena variabilis</i> ATCC 29413                         | Wild type                                                                                                                                                                 |                     |
| <i>Nostoc</i> sp. PCC 7120<br>( <i>Anabaena</i> sp. PCC 7120) | Wild type                                                                                                                                                                 |                     |
| <b>Plasmids</b>                                               |                                                                                                                                                                           |                     |
| pUC18                                                         | Cloning vector, Ap <sup>r</sup>                                                                                                                                           | 10                  |
| pBAD2- <i>bgaB</i>                                            | Arabinose inducible; reporter gene system for translational fusions to <i>bgaB</i> ; Ap <sup>r</sup>                                                                      | 11                  |
| pBAD2- <i>hsp17</i> (pBO1836)                                 | pBAD2- <i>bgaB</i> based, <i>Synechocystis hsp17</i> -5'UTR plus 2 codons fused to <i>bgaB</i>                                                                            | 11                  |
| pT7 <i>hspA</i> -cdr (pBO1858)                                | pUC18 based, contains T7 promoter, <i>hspA</i> -5'UTR plus 20 codons, HpyCH4v                                                                                             | This study          |
| pUC18- <i>avashort</i> (pBO2154)                              | pUC18 cloning vector harboring <i>ava3076</i> -5'UTR plus 2 codons (NheI, EcoRI)                                                                                          | This study          |
| pUC18- <i>avalong</i> (pBO2155)                               | pUC18 cloning vector harboring <i>ava4812</i> -5'UTR plus 2 codons (NheI, EcoRI)                                                                                          | This study          |
| pUC18- <i>alrshort</i> (pBO2761)                              | pUC18 cloning vector harboring <i>alr0286</i> -5'UTR plus 2 codons (NheI, EcoRI)                                                                                          | This study          |
| pUC18- <i>alrlong</i> (pBO2762)                               | pUC18 cloning vector harboring <i>alr1809</i> -5'UTR plus 2 codons (NheI, EcoRI)                                                                                          | This study          |
| pBAD2- <i>avashort</i> (pBO2161)                              | pBAD2- <i>bgaB</i> based, insert cloned from pUC18- <i>avashort</i> via NheI, EcoRI                                                                                       | This study          |
| pBAD2- <i>avalong</i> (pBO2162)                               | pBAD2- <i>bgaB</i> based, insert cloned from pUC18- <i>avalong</i> via NheI, EcoRI                                                                                        | This study          |
| pBAD2- <i>alrshort</i> (pBO2795)                              | pBAD2- <i>bgaB</i> based, insert cloned from pUC18- <i>alrshort</i> via NheI, EcoRI                                                                                       | This study          |
| pBAD2- <i>alrlong</i> (pBO2796)                               | pBAD2- <i>bgaB</i> based, insert cloned from pUC18- <i>alrlong</i> via NheI, EcoRI                                                                                        | This study          |
| pT7 <i>avalong</i> (pBO2772)                                  | pUC18 based, contains T7 promoter, <i>avalong</i> -5'UTR plus ATG, EcoRV                                                                                                  | This study          |
| pT7 <i>avashort</i> -cdr (pBO2775)                            | pUC18 based, contains T7 promoter, <i>avashort</i> -5'UTR plus 24 codons, EcoRV                                                                                           | This study          |
| pBAD2- <i>avalong</i> $\Delta$ loop1 (pBO2799)                | pBAD2- <i>avalong</i> -based, site directed mutagenesis with primers 712, 713                                                                                             | This study          |
| pBAD2- <i>avalong</i> $\Delta$ T90 (pBO3051)                  | pBAD2- <i>avalong</i> -based, site directed mutagenesis with primers 716, 717                                                                                             | This study          |
| pBAD2- <i>avalong</i> CC88/91AA (pBO2816)                     | pBAD2- <i>avalong</i> -based, site directed mutagenesis with primers 1278, 1279                                                                                           | This study          |
| pBAD2- <i>avalong</i> 2A (pBO2793)                            | pBAD2- <i>avalong</i> -based, site directed mutagenesis with primers 980, 981                                                                                             | This study          |

|                                           |                                                                                 |            |
|-------------------------------------------|---------------------------------------------------------------------------------|------------|
| pBAD2- <i>avalong4A</i> (pBO2794)         | pBAD2- <i>avalong</i> -based, site directed mutagenesis with primers 1003, 1004 | This study |
| pBAD2- <i>avashort</i> -antiSD1 (pBO2751) | pBAD2- <i>avashort</i> -based, randomized substitution of C34, C35 by T34, A35  | This study |
| pBAD2- <i>avashort</i> -antiSD2 (pBO2752) | pBAD2- <i>avashort</i> -based, randomized substitution of C34, C35 by T34, T35  | This study |
| pBAD2- <i>avashort</i> -antiSD3 (pBO2753) | pBAD2- <i>avashort</i> -based, randomized substitution of C34, C35 by G34, A35  | This study |
| pBAD2- <i>avashort</i> -antiSD4 (pBO2754) | pBAD2- <i>avashort</i> -based, randomized substitution of C34, C35 by G34, G35  | This study |
| pBAD2- <i>avashort</i> C46A (pBO2798)     | pBAD2- <i>avashort</i> -based, site directed mutagenesis with primers 734, 735  | This study |

### Oligonucleotides

|                           |                                                                         |
|---------------------------|-------------------------------------------------------------------------|
| 371 T7 <i>hspA</i> for    | GAAATTAATACGACTCACTATAGGGGGGTAGAGGGAATCAGCCCAAG (pBO1858)               |
| 372 <i>hspA</i> _cdrev    | <u>TGCAGTTCATTTGGCGTTGAATTGC</u> (pBO1858)                              |
| 552 for- <i>bgaB3076</i>  | <u>TTGCTAGCAAGATTAAGCCTGGAAGCG</u> (pBO2154, RNA probe forward primer)  |
| 553 rev- <i>bgaB3076</i>  | <u>TTGAATTCTGTCATATCTTTGACTCCTC</u> (pBO2154)                           |
| 550 for- <i>bgaB4812</i>  | <u>TTGCTAGCGAAGGAGCTAGAGATTAAGC</u> (pBO2155, RNA probe forward primer) |
| 551 rev- <i>bgaB4812</i>  | <u>TTGAATTCTGCCATAATATCACCTCTAA</u> (pBO2155, pBO2762)                  |
| 1002 for- <i>bgaB0286</i> | <u>TTGCTAGCAAATGAAAGATTAAGCCTG</u> (pBO2761)                            |
| 668 Revalr0286            | <u>TTGAATTCTGTCATAGTTTTGACTCCTC</u> (pBO2761)                           |
| 526 for- <i>bgaB1809</i>  | <u>TTGCTAGCGAAGGAGCTAGAAATTAAGC</u> (pBO2762)                           |
| 862 T73076for             | TTGAAATTAATACGACTCACTATAGGAAGATTAAGCCTGGAAGCG (pBO2775)                 |
| 857 3076_72cdrev          | <u>TTGATATCCTCAAACAAATGATTTAA</u> (pBO2775)                             |
| 859 T74812for             | TTGAAATTAATACGACTCACTATAGGGAAGGAGCTAGAGATTAAGC (pBO2772)                |
| 860 4812bluntrev          | <u>TTGATATCCATAATATCACCTCTAAAATGC</u> (pBO2772)                         |
| 712 4812dloop_for         | GATTAAGCTTTTCCACAAAAAAGCTTAATAATAGC (pBO2799)                           |
| 713 4812dloop_rev         | GCTATTATTAAGCTTTTTTGTGGAAAAGCTTAATC (pBO2799)                           |
| 716 4812dT90_for          | GCTTAATAATAGCCTCTGATAAGCAAATGTTG (pBO3051)                              |
| 717 4812dT90_rev          | CAACATTTGCTTATCAGAGGCTATTATTAAGC (pBO3051)                              |
| 1278 QCC88/91Afw          | GCTTAATAATAGCATTATGATAAGCAAATGTTGC (pBO2816)                            |
| 1279 QCC88/91Arv          | GCAACATTTGCTTATCATAATGCTATTATTAAGC (pBO2816)                            |
| 710 3076QC_for            | GCGATTTCGCAGGAAAA <b>DD</b> TTAGAGGAGTCAAAG (pBO2751-2754)              |
| 711 3076QC_rev            | CTTTGACTCCTCTAA <b>HH</b> TTTTTCTGCGAATCGC (pBO2751-2754)               |
| 734 3076_C46A_for         | GGAAAACCTTAGAGGAGTAAAAGATATGACAGAATTC (pBO2798)                         |
| 735 3076_C46A_rev         | GAATTCTGTCATATCTTTTACTCCTCTAAGGTTTTCC (pBO2798)                         |

|                            |                                                         |
|----------------------------|---------------------------------------------------------|
| 529 RACE_3076              | TCTTGCCAAGGGTTCCAACG                                    |
| 461 RACE_4812              | TCTTCAAGTTCAGCAGCAGG                                    |
| Adapter for 5'RACE         | GTCAGCAATCCCTAACGAG ( <i>GAG ribonucleotides</i> )      |
| Adapter primer for 5'RACE  | GTCAGCAATCCCTAACGAG                                     |
| 1028 avashort_RNAprobe_rev | GAAATTAATACGACTCACTATAGGGAGGTAATGTCAAATTC AAG           |
| 1029 avalong_RNAprobe_rev  | GAAATTAATACGACTCACTATAGGGAGCCAGCAGCAGATTCAATG           |
| 980 Qc_c53-4af             | CAAATTAATTC AACAATATAAATCTTATTTAATTAGTAAAAAGC (pBO2793) |
| 981 Qc_c53-4ar             | GCTTTTTACTAATTAATAAGATTTATATTGTTGAATTAATTTG (pBO2793)   |
| 1003 Qc4812_53-6A          | AAATTAATTC AACAATATAAAAATTATTTAATTAGTAAAAAG (pBO2794)   |
| 1004 Qc4812_53-6A          | CTTTTTACTAATTAATAATTTTTTATATTGTTGAATTAATTT (pBO2794)    |

## Supplementary references

1. Goujon M, McWilliam H, Li W, Valentin F, Squizzato S, Paern J, Lopez R. A new bioinformatics analysis tools framework at EMBL-EBI. *Nucleic Acids Res* 2010; 38:W695-9.
2. Larkin MA, Blackshields G, Brown NP, Chenna R, McGettigan PA, McWilliam H, Valentin F, Wallace IM, Wilm A, Lopez R, et al. Clustal W and Clustal X version 2.0. *Bioinformatics* 2007; 23:2947-8.
3. Kojima K, Nakamoto H. Specific binding of a protein to a novel DNA element in the cyanobacterial small heat-shock protein gene. *Biochem Biophys Res Commun* 2002; 297:616-24.
4. Roy SK, Nakamoto H. Cloning, characterization, and transcriptional analysis of a gene encoding an alpha-crystallin-related, small heat shock protein from the thermophilic cyanobacterium *Synechococcus vulcanus*. *J Bacteriol* 1998; 180:3997-4001.
5. Sambrook JE, Russel D. *Molecular cloning: A laboratory manual*. New York: Cold Spring Harbor Laboratory Press, 2001.
6. Hanahan D. Studies on transformation of *Escherichia coli* with plasmids. *J Mol Biol* 1983; 166:557-80.
7. Yamaoka T, Satoh K, Katoh S. Photosynthetic activities of a thermophilic blue-green alga. *Plant Cell Physiol* 1978; 19:943-54.
8. Wolk CP, Wojciuch E. Simple methods for plating single vegetative cells of, and for replica-plating, filamentous blue-green algae. *Arch Mikrobiol* 1973; 91:91-5.
9. Adams DG. Isolation and restriction analysis of DNA from heterocysts and vegetative cells of cyanobacteria. *J Gen Microbiol* 1988; 134:2943-9.
10. Norrander J, Kempe T, Messing J. Construction of improved M13 vectors using oligodeoxynucleotide-directed mutagenesis. *Gene* 1983; 26:101-6.
11. Klinkert B, Cimdins A, Gaubig LC, Roßmanith J, Aschke-Sonnenborn U, Narberhaus F. Thermogenetic tools to monitor temperature-dependent gene expression in bacteria. *J Biotechnol* 2012; 160:55-63.
